# Supplementary material
Source: PubMed Central journal article supplement (PMC9751705)
Supplement: mmc1.pdf [file mmc1.pdf]

# THE LANCET

## Supplementary appendix

This appendix formed part of the original submission. We post it as supplied by the authors.

Supplement to: Bucci EM, Berkhof J, Gillibert A, et al. Data discrepancies and substandard reporting of interim data of Sputnik V phase 3 trial. *Lancet* 2021; published online May 12. [http://dx.doi.org/10.1016/S0140-6736\(21\)00899-0](http://dx.doi.org/10.1016/S0140-6736(21)00899-0).

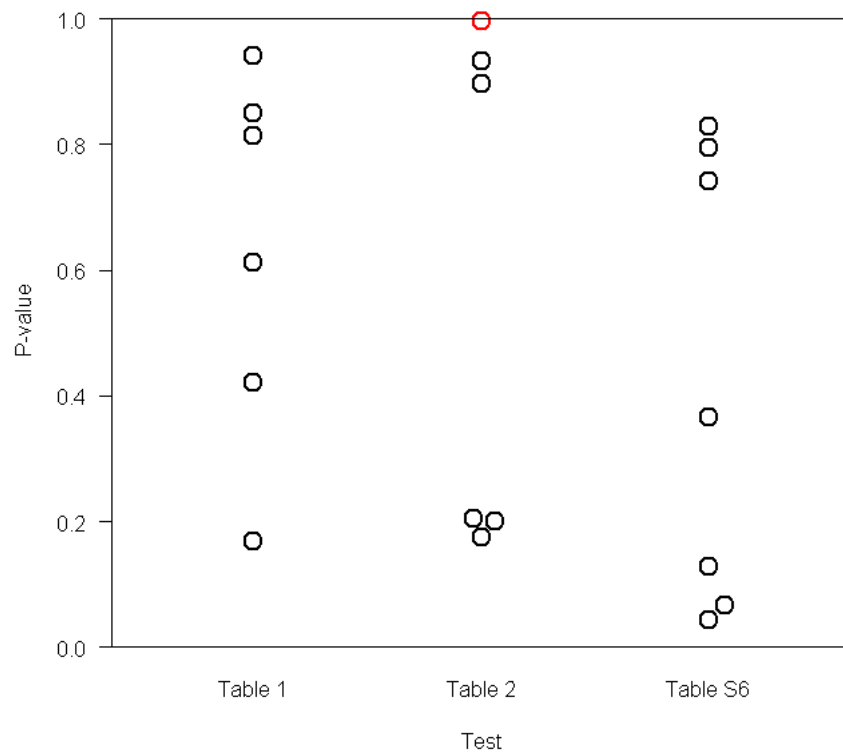

Beeswarm plot of distribution of the 19 P-values that have been computed from table 1, table S6 and table 2. The red dot represents the test of interaction of age with vaccine efficacy ( $P=0.9963$ ).
